1 **Title:** Rapid genomic evolution in *Brassica rapa* with bumblebee selection in  
2 experimental evolution

3

4 **Author affiliations**

5 Léa Frachon\*, Florian P. Schiestl

6 Department of Systematic and Evolutionary Botany, University of Zürich, Switzerland.

7 **\*Corresponding author:** Léa Frachon

8 Email: lea.frachon@systbot.uzh.ch, Phone: +41 44 63 48435

9

10 **Key words:** fast cycling *Brassica rapa*, experimental evolution, genomic variance, rapid genomic  
11 evolution, bumblebees' selection

12

13 **Abstract**

14 Insect pollinators shape rapid phenotypic evolution of traits related to floral attractiveness and  
15 plant reproductive success. However, the underlying genomic changes and their impact on standing  
16 genetic variation remain largely unknown despite their importance in predicting adaptive responses in  
17 nature or in crop's artificial selection. Here, based on a previous, nine generation experimental  
18 evolution study with fast cycling *Brassica rapa* plants adapting to bumblebees, we document genomic  
19 evolution associated to the adaptive process. We performed a genomic scan of the allele frequency  
20 changes along the genome and estimated the nucleotide diversity and genomic variance changes. We  
21 detected signature of selection associated with rapid changes in allelic frequencies on multiple loci.  
22 During experimental evolution, we detected an increase in overall genomic variance, whereas for loci  
23 under selection, a reduced variance was apparent in both replicates suggesting a parallel evolution.  
24 Our study highlights the polygenic nature of short-term pollinator adaptation and the importance of a  
25 such genetic architecture in the maintenance of genomic variance during strong natural selection by  
26 biotic factors.

## 27 Introduction

28 Pollinator insects are important selective agents for wild- and crop plant species due to their  
29 essential role in the reproduction of most flowering plants [1]. While a decline of insect pollinators has  
30 been detected in different geographical regions and insect families [2, 3, 4], the understanding of the  
31 adaptive potential of plants to such changes in their biotic environment remains in its infancy. Plant  
32 adaptation to pollinators typically involves traits associated to flower attractiveness such as (1) flower  
33 morphology [5, 6, 7], flower colour [8, 9], flower scent [10, 11, 12], and (2) traits associated to mating  
34 system like herkogamy [13, 14] or selfing [15, 16]. While most of the studies assessed the result of  
35 long-term evolutionary adaptation to pollinators, tracking the adaptive processes across generations  
36 remains poorly described. Both a resurrection approach in natural populations, growing seeds from  
37 different generations together, or experimental evolution studies, applying the same selective  
38 pressure for multiple generations, can bridge this gap. For instance, using a resurrection approach,  
39 Thomann et al. [17] observed phenological and reproductive trait changes over 18 years in *Adonis*  
40 *annua* plants in response to the loss of wild bees. While this approach benefits from ecological realism  
41 in natural populations, it makes it difficult to differentiate the effect of the factor of interest from other  
42 factors such as climate, also shaping plant evolution. Gervasi and Schiestl [10] performed experimental  
43 evolution with fast-cycling *Brassica rapa* plants evolving with different pollinators and under controlled  
44 conditions, to identify the evolutionary response to pollinator-mediated selection. They showed,  
45 within nine generations of experimental evolution, rapid plant adaptation to bumblebee pollination in  
46 phenotypic traits, such as floral volatiles, UV reflection and plant height. However, while the evolved  
47 traits are known to be heritable [18, 19], the genomic changes underlying these rapid plant phenotypic  
48 changes are still unknown.

49 In the current context of pollinator decline and the associated changes in pollinator communities,  
50 analyzing the genetic architecture of adaptation to pollinators and its association to standing genetic

51 variation is essential to understand the adaptative potential of plants in changing environments [20,  
52 21, 22]. Molecular genetic studies have uncovered the molecular and genetic bases of several traits  
53 involved in pollination and pollinator attractiveness such as selfing [23], pollination syndromes [24, 8,  
54 25, 26, 27], nectar [28, 29] and volatiles [30, 31, 32, 33, 34]. However, insects use a combination of  
55 signals (shape, colour, scent) and rewards for identifying suitable flowers leading to plant adaptation  
56 based on multiple traits [35]. For instance, honest signals (signals associated with reward) and  
57 pollination syndromes (convergent evolution of specific signal combinations selected by pollinators)  
58 are good examples of evolution of multiple traits. In a context of rapid changes, genetic correlation  
59 among traits may allow the synchronous response of different phenotypic traits to varying patterns of  
60 selection [36, 37, 19]. However, we are still in the infancy of understanding the genetic basis involved  
61 in the rapid evolutionary response of plants to pollinator changes. Identification of genomic regions  
62 involved in plant adaptation to pollinators is essential to predict the adaptive potential of plants to  
63 pollinator changes and enable breeding of more attractive crop plants. In addition, an important aspect  
64 in conservation is to understand the mechanisms maintaining genetic diversity within populations. In  
65 fact, standing genetic variation is an important resource for rapid response to environmental changes  
66 [38, 39], and strong directional selection is considered to lead to the loss of genetic diversity resulting  
67 in a loss of adaptive potential in populations [40].

68         Here, based on previous experimental evolution performed by Gervasi and Schiestl [10] with  
69 outcrossing fast-cycling *Brassica rapa* plants, we tracked the genomic changes involved in the  
70 adaptative response of plants to bumblebee selection compared to hand pollinated control plants. We  
71 dissected the main changes observed in the genetic architecture during selection via bumblebee-  
72 pollination compared to hand-pollination. Finally, we documented the changes in genetic diversity  
73 observed in the context of strong selection by estimating the average nucleotide diversity and genomic  
74 variance before and after experimental evolution.

75 **Results**

76 **Genomic changes during bumblebee selection.** In our study, we observed allele frequency changes  
77 ( $\Delta h$ ) over nine generations in both bumblebee and control treatments. For instance, 214 alleles (4.5%  
78 of all SNPs) were monomorphic after nine generations in the control treatment, against 344 alleles  
79 (7.3% of total SNPs) in the bumblebee treatment. Overall, larger genomic changes were observed in  
80 the bumblebee treatment compared to the control treatment (**Figure 1A**). Controlling for random  
81 genetic drift, we observed significant changes ( $pvalue < 0.05$ ) for 195 SNPs (4.1% of the 4'713 SNPs) in  
82 the control treatment (**Figure 1C**), and for 353 SNPs (7.5% of the 4'713 SNPs) in the bumblebee  
83 treatment (**Figure 1D**). The most important changes ( $pvalue < 0.05$  and  $\Delta h > 0.5$ ) were observed to be  
84 3.2-times higher under bumblebee selection (76 SNPs) than in the control group (24 SNPs, **Figure**  
85 **1BCD**). The most significant allele frequency change ( $pvalue < 0.01$ ) was absolute( $\Delta h$ ) = 0.70 with a  
86 mean of  $0.41 \pm 0.12$  SD in the control treatment, while it was absolute( $\Delta h$ ) = 0.80 with a mean of  $0.52$   
87  $\pm 0.2$  SD in the bumblebee treatment (**Figure 2, Figure S3**).

88 As expected, the selective process is associated with an increase of linkage disequilibrium in  
89 the bumblebee treatment, but also in the control treatment. In fact, while the median linkage  
90 disequilibrium decay was slower in the first generation ( $r^2 \sim 0.2$ ), this decay increased during selection  
91 in both control ( $r^2 \sim 0.3$ ) and the bumblebee treatment ( $r^2 \sim 0.35$ ) in the ninth and the inter-replicate  
92 crossing generation (**Figure 3A**). For instance, in the two genomic regions most under bumblebee  
93 selection, we observed an important increase of the LD in the bumblebee treatment, stronger than in  
94 the control treatment (**Figure 2B & C**). As expected with the increase of LD, we observed a decrease of  
95 the number of LD blocks over nine generations (from 949 LD blocks in first generation, to 818 LD block  
96 in the control treatment and 791 in the bumblebee treatment) and an increase of their length (**Figure**  
97 **3B, Table S1**).

98 **Identity of candidate genes underlying genomic evolution to bumblebees.** After retrieving the  
99 annotated genes around 4.2kb (2.1kb upstream, 2.1kb downstream) of the 76 SNPs with allele  
100 frequency changes for the bumblebee treatment ( $p$ value  $< 0.05$ ,  $\Delta h > 0.5$ ), we obtained a list of 32  
101 candidate genes (**Table S2**). Briefly, most of these genes are involved in encoding receptor kinases  
102 (LRR\_3, RIOK2), transporters (ABGG35, ABCG38, SLAH1) and signalling (PTI1, PP2C16, PEX3, PSMA7,  
103 LOG1, LOG3). ABC transporters may play a role in floral scent production in *Brassica*, as recently shown  
104 for *Petunia* [41], a trait under strong selection in the study of Gervasi and Schiestl [10]. Interestingly,  
105 the cytokinins encoded by LONELY GUY (like LOG1 and LOG3 in our results) are known for their  
106 importance in reproductive development in *Arabidopsis* [42]. Some candidate genes are also involved  
107 in pectin synthesis and pollen tube growth (GALT6, 43). However, in view of the low number of markers  
108 used in our study, complementary analyses are needed to validate the implication of these genes or  
109 biological processes in plant response to bumblebee selection.

110 **Genetic diversity and overall genomic variance.** In order to assess the changes in genetic diversity  
111 during experimental evolution, we estimated the nucleotide diversity across the genome for the 256  
112 individuals in a sliding window of 4.2kb (median LD block length in ninth generation after bumblebee  
113 selection). We did not observe any shift of the nucleotide diversity over nine generation of selection  
114 (**Figure 3B**). The average nucleotide diversity ( $\pi$ ) in the first generation (mean  $\pi = 15.8 \cdot 10^{-5}$ ,  $\pm 11 \cdot 10^{-5}$   
115 SD) is similar to the ninth generations (mean  $\pi = 15.7 \cdot 10^{-5}$ ,  $\pm 11.5 \cdot 10^{-5}$  SD for control treatment, mean  
116  $\pi = 15.6 \cdot 10^{-5}$ ,  $\pm 11.2 \cdot 10^{-5}$  SD for bumblebee treatment). The average nucleotide diversity remained  
117 similar after the inter-replicate crossing (mean  $\pi = 16 \cdot 10^{-5}$ ,  $\pm 11.8 \cdot 10^{-5}$  SD for control treatment, mean  
118  $\pi = 15.8 \cdot 10^{-5}$ ,  $\pm 11.5 \cdot 10^{-5}$  SD for bumblebee treatment).

119 Using all SNPs in a genomic principal component analysis (PCA), we observed a structuring of  
120 our samples determined by generations, treatments, and replicates (**Figure 4A** and **figures S4**). Along  
121 the two first principal components (PCs), explaining 24.5% of the total genomic variance, all individuals

122 from the two replicates of generation one were well grouped together, and individuals from the latest  
123 generations were clearly separated from the first generation, but they were also separated between  
124 treatments (**Figure 4A**). We observed the same pattern in the principal components 3 and 4, explaining  
125 17% of the total genomic variance (cumulative variance of the first four axes is 41%, **Figures S4A**).

126 For plants of generation nine, the pattern of genomic evolution was different between the  
127 selection treatments (control vs bumblebee). Interestingly, the individuals from the bumblebee  
128 treatment were more dispersed in genomic space represented by principal components PC1, PC2 and  
129 PC4 than the individuals from the first generation, highlighting a considerable increase of genomic  
130 variance (filled orange and yellow dots/bars (G1) and blue dots/bars (B9 and B10), **Figure 4ACD** and  
131 **figure S4ACD**). In the control treatment, the variance of the samples of the genomic space created by  
132 the principal components (*i.e.* the genomic variance) was similar between the first and last generations  
133 (filled orange and yellow dots/bars (G1) and green dots/bars (C9 and C10), **Figure 4ACD** and **figure**  
134 **S4ACD**). The average genomic variance among individuals from the bumblebee treatment increased  
135 75-fold in PC1 and 191-fold in PC2 (2-fold in PC3 and 61-fold in PC4) over nine generations (**Table S3**).  
136 In the ninth generation, the average genomic variance of samples on the PC1 was 3-fold greater and  
137 140-fold for PC2 (0.04-fold for PC3 and 39-fold for PC4) in the bumblebee treatment than in the control  
138 treatment (**Table S2**).

139 In the dataset with the 76 SNPs under strongest bumblebee selection (1.6% of the total SNPs),  
140 we observed a different pattern. Using this subset of SNPs, only individuals of the bumblebee  
141 treatment were clearly separated from the individuals of the first generation and the control treatment  
142 in the genomic space represented by the first two PCs axes (**Figure 4B**). In the bumblebee treatment,  
143 while the replicates were separated in the dataset with all SNPs (4'713 SNPs, **Figure 4A**), they were  
144 clustered closely together (**Figure 4B**) for the 76 SNPs under selection, indicating shared directional

145 selection and parallel evolution (this pattern appears to be unrelated to a sub-sampling of the dataset,  
146 **Figure S5**).

147 In terms of overall genetic variance, in the bumblebee treatment, we observed a lower relative  
148 variance among individuals, on the PC1, PC2 and PC4, for the subset of selected SNPs (76 SNPs)  
149 compared to the all-SNPs dataset (**Figure 4CD** and **figure S4CD**). In the subset of selected SNPs, we  
150 observed no clear patterns among treatment, generation, and replicate in the variance of individuals  
151 for PC1, PC3 and PC4 (**Figure 4C**), while for PC2, a decrease of genomic variance was detected (**Figure**  
152 **4D**).

153

## 154 **Discussion**

155 Understanding how and how fast selection affects standing genetic variation within the  
156 genome remains an important challenge in conservation as well as in evolutionary genomics. Here, we  
157 screened for the genomic consequences of biotic selection in an experimental evolution experiment  
158 by sequencing genome-wide SNP markers in *Brassica rapa* plant individuals before and after nine  
159 generations of selection by bumblebees, and under random hand-pollination. As shown previously at  
160 the level of the phenotype, this primarily outcrossing plant shows rapid adaptation to specific  
161 pollinators [10]. We documented signature of directional selection driven by bumblebee pollinators,  
162 with allele frequency changes at several loci, as well as parallel genomic evolution. Interestingly, we  
163 documented a maintenance of standing genetic variation across the genome, a finding that challenges  
164 the assumption of a general loss of genetic variation in evolving small populations.

165 In agreement with the previously demonstrated phenotypic selection and evolution in the fast-  
166 cycling *Brassica rapa* experimental system [10] in traits known to be heritable [18, 17], we have shown  
167 genomic evolution across nine generations associated with the signature of selection. The here  
168 documented changes in allele frequencies, increasing linkage disequilibrium, as well as parallel

169 evolution of genomic regions the most under selection, underline the importance of pollinators in  
170 shaping plant rapid genomic evolution. Such rapid adaptive evolution is in line with previous results  
171 documented in plants responding during only few generations to environmental changes in response  
172 to climate variation [44, 45]. However, while many studies reveal the genomic architecture involved in  
173 plant adaptation to climate [46, 47, 48, 49], few studies have investigated the genomic regions involved  
174 in plant adaptation to biotic factors (pollinators, plants, microorganisms, herbivores, etc.) despite their  
175 obvious importance given their direct interaction with plants.

176 Our study highlighted the potential involvement of multiple loci in rapid adaption to bumblebees,  
177 which agrees with studies highlighting a polygenic genetic architecture underlying floral evolution [27,  
178 37]. On the short evolutionary timescale applied in our study, the involvement of multiple loci can be  
179 explained both by the selective agent itself, selecting for combinations of different phenotypic traits,  
180 and/or by the complexity of pathways regulating them i.e., many loci underlying a single trait [50, 51].  
181 Studies based on population divergence or reproductive isolation between closely related species have  
182 shown the importance of polygenic genetic architecture in floral- and reproductive trait evolution [52,  
183 53, 54, 55]. Whereas these studies focus on adaptation to abiotic parameters, other recent studies  
184 have also highlighted a complex genetic architecture involved in the evolution of mating system or  
185 petal colour during pollinator shifts leading to reproductive barriers between species [56, 57]. In our  
186 study, the polygenic architecture underlying adaptation to bumblebees could be explained by the  
187 observed combination of phenotypic traits involved in the increase attractiveness to bumblebees  
188 shown by Gervasi and Schiestl [10]. Among our 32 candidate genes under selection, interestingly,  
189 several are associated to transporters, signalling pathways and potential kinase receptors. The function  
190 of these genes could be associated to the production and emission of volatile organic compounds  
191 involving complex biosynthetic pathways [58], as volatiles were prominently evolving traits in Gervasi  
192 and Schiestl [10]. However, the low-density of markers used in our study, the low number of genome-  
193 by-sequencing tags and the absence of phenotypic trait data do not allow us to unravel with certainty



194 the number and the identity of the genes under selection. Moreover, among loci under-selection, for  
195 some of them, no annotation could be found, or with unknown functions, highlighted the need to  
196 deepen our knowledge on function of genes involved in plant-pollinator interactions. Then, the relative  
197 contribution of individual loci to the phenotypic variation that matters for bumblebee attraction is still  
198 unknown and deserves more attention in the future.

199 In genomic regions most under selection, a loss of genetic variance was observed, as expected by  
200 the selective sweep model where beneficial mutations' frequency increases in a population until  
201 fixation [59]. It is well known that selective sweeps lead to loss of diversity in favorable alleles and in  
202 their surrounding region due to a hitchhiking effect [60]. However, in our study we also observed a  
203 maintenance of nucleotide diversity, and an increase of overall genomic variance despite the strong  
204 selection imposed by bumblebees during experimental evolution [10], and the small effective size of  
205 the populations. This increase of overall genomic variance was observed among individuals in both  
206 replicates (B9A and B9B), as well as in the inter-replicate crossing (B10). This pattern might be  
207 explained by a weaker selection acting on multiple standing variants (soft sweep) and by the multiple  
208 loci underlying individual phenotypic trait evolutionary changes. An increased number of studies  
209 demonstrate the importance of polygenic adaptation [61, 62, 50] related to the infinitesimal model  
210 (reviewed in Barton et al. [63]), where local adaptation is driven by small allele frequency changes in  
211 multiple loci. This outcome is supported by recent work observing the maintenance of standing genetic  
212 variation during long-term artificial selection on chicken weight, mainly explained by selection acting  
213 on highly polygenic architecture [64]. Multiple genes underlying phenotypic variation are widely  
214 emphasized in plants with the advances of GWAs [61], however their involvement in the maintenance  
215 of standing genetic variation is still poorly understood and deserves further studies.

216

217

## 218 **Conclusion**

219 We revealed important genomic changes on multiple loci during bumblebee selection during only  
220 nine generations. We hypothesize that the observed complexity of the genetic architecture allows the  
221 maintenance of a high standing genetic variation essential for rapid adaptation to future changes. Our  
222 study is a first step in the understanding of the complex genomic mechanisms involved during rapid  
223 evolutionary adaptation to biotic factors, and we advocate further analyses to understand (1) the  
224 genetic architecture underlying phenotypic variation, (2) pleiotropic effects of quantitative-trait locus  
225 in rapid adaptation and (3) the mechanisms behind a maintenance of genetic variance. We also  
226 underline the importance of better characterizing the gene functions involved in plant-pollinator  
227 interactions. Overall, pollinators constitute complex patterns of selection which deserve more  
228 attention for predicting the adaptive responses of wild and crop plant species to their decline.

229

## 230 **Material and methods**

231 **Plant material and experimental design.** *Brassica rapa* (Brassicaceae) is an outcrossing plant with  
232 genetic self-incompatibility, pollinated by diverse insects such as bumblebees, flies or butterflies [65].  
233 Our study used rapid-cycling *Brassica rapa* plants (Wisconsin Fast Plants) selected for its short life cycle  
234 of approximately two months from seed to seed. The plants used in this study were grown from seeds  
235 produced by the study of Gervasi and Schiestl [10], performing experimental evolution with  
236 bumblebees and control hand pollination. We used one seed per individual from 64 plants (half of  
237 replicate A and half of replicate B) of (1) the starting generation (generation 1; here called A1 and B1);  
238 (2) the ninth generation selected by bumblebees (bumblebee treatment; here called B9A and B9B); (3)  
239 the ninth generation of control hand pollination plants (control treatment; here called C9A and C9B;  
240 **Figure S1**). Finally, we performed crossings between replicates A and B within each treatment,  
241 (generation 10) yielding 32 individuals from the bumblebee treatment (inter-replicate crossing in

242 bumblebee treatment; here called B10) and 32 individuals from the control treatment (inter-replicate  
243 crossing in control treatment; here called C10). These manual crossing are commonly used for reducing  
244 the effect of potential inbreed depression on trait changes. Pollen donors and receivers were randomly  
245 assigned in these crossing. Each combination of generation\*treatment\*replicate is called a population  
246 (e.g. ninth generation, treatment bumblebees, replicate A called B9A is a population). A total of 256  
247 seeds from these 8 populations (first, ninth and tenth generation) were sown out in a phytotron (first  
248 generation in 2017 and ninth generation as well as the inter-replicate crossing in 2019) and the leaf  
249 tissue of each plant was collected for DNA extraction and whole genomic sequencing.

250 **DNA extraction and genomic characterization.** Because leaf tissue was collected in 2017 for the first  
251 generation and 2019 for the last generations, we adapted the collection storage (drying vs freezing).  
252 Leaf material from the first generation was dried in vacuum at 40 °C for 20 hours, and leaf material  
253 from the ninth and tenth generation was stored in -80°C. A high molecular weight DNA extraction  
254 (average DNA concentration of 48 ng/μL, LGC extraction protocol) and library preparation for  
255 genotyping-by-sequencing (restriction enzyme MspI, insert size mean range ~215bp) was performed  
256 by the LGC Genomics group Berlin. Samples were sequenced with Illumina NextSeq 500 V2 sequencer  
257 using 150 paired-end reads; the alignment of our samples was performed with BWA version 0.7.12  
258 against the reference genome sequence of *Brassica rapa* FPsc v1.3, Phytozome release 12  
259 (<https://phytozome.jgi.doe.gov/pz/portal.html>) by the LGC Genomics group Berlin. The variant  
260 discovery and the genotyping were realized using Freebayes v1.0.2-16 with the following parameters  
261 by the LGC Genomic Group Berlin: --min-base-quality 10 --min-supporting-allele-qsum 10 --read-  
262 mismatch-limit 3 --min-coverage 5 --no-indels --min-alternate-count 4 --exclude-unobserved-  
263 genotypes --genotype-qualities --ploidy 2 or 3 --no-mnps --no-complex --mismatch-base-quality-  
264 threshold 10. We then performed a quality trimming on chromosomes (we discarded the scaffolds)  
265 using vcftools, removing SNPs with missing data in more than 5% of the individuals (function --max-  
266 missing 0.95, i.e. genotype calls had to be present for at least 243 samples out of 256 for a SNP to be

267 included in the downstream analysis), and retained only bi-allelic SNPs with a minimum average Phred  
268 quality score of 15 (function `--minGQ 15`) and a maximum mean depth value of 100 (function `--max-`  
269 `meanDP 100`, distribution in **Figure S3**). Finally, we discarded SNPs with a minor allele frequency (MAF)  
270 lower than 0.1 (function `--maf 0.1`, distribution in **Figure S3**). The final dataset contained 4'713 SNPs  
271 in ~ 215Mb genome size.

272 **Allele frequency changes.** The allele frequencies of the reference allele for the 4'713 SNPs were  
273 estimated within each populations using VCFtools (function `--freq`). To control for potential genetic  
274 drift during the nine generations of evolution, we simulated random final allele frequencies 10'000-  
275 fold for different ranges of initial allele frequencies (from 0 to 1 by an interval window of 0.01). The  
276 simulations were performed using the R environment package “learnPopGen” (function  
277 “drift.selection”, 66) over eight transitions between generations (*i.e.* from the first generation to the  
278 ninth generation) considering 32 individuals within each population for an effective size ( $N_e$ ) of 16 (*i.e.*  
279 individuals contributing to the next generation, see details of experimental evolution in Gervasi and  
280 Schiestl [10]), and considering an equal fitness for each individual. From these simulations, a *P value*  
281 was estimated for each SNP using the following equations:

282 (1) For a decrease of reference allelic frequency *i.e.*  $(AF_{\text{initial}} - AF_{\text{final}}) > 0$ , *pvalue* = (number of  
283 simulation with  $AF_{\text{simulated}} \geq AF_{\text{final}}$ )/10'000

284 (2) For an increase of reference allelic frequency *i.e.*  $(AF_{\text{initial}} - AF_{\text{final}}) < 0$ , *pvalue* = (number of  
285 simulation with  $AF_{\text{simulated}} \leq AF_{\text{final}}$ )/10'000

286 (3) For  $(AF_{\text{initial}} - AF_{\text{final}}) = 0$ , *pvalue* = 1

287 With  $AF_{\text{simulated}}$  = simulated final allele frequency,  $AF_{\text{initial}}$  = initial allele frequency from the  
288 reference allele (first generation), and  $AF_{\text{final}}$  = observed final allele frequency for the reference allele  
289 (ninth generation). Using these parameters, the minimum expected *pvalue* is  $\sim 1.10^{-4}$  (1/10'000),  
290 except for final allelic frequency completely out of the simulated range (*i.e.* zero simulated allele

291 frequencies are all higher or lower than the final observed allele frequency) would be associated with  
292  $p$ -value=0.

293 Finally, we estimated the allele frequency changes ( $\Delta h$ ) from the reference allele according to  
294 the equation (1) for both bumblebee and control treatments:

$$295 \quad \Delta h = AF_{\text{final}} - AF_{\text{initial}} \quad (1)$$

296 Where  $\Delta h$  is the allelic frequency change between the first and the ninth generation,  $AF_{\text{initial}}$  is the initial  
297 observed allele frequency, and  $AF_{\text{final}}$  is the observed final allele frequency at the ninth generation.

298 **Estimation of linkage disequilibrium (LD) changes across rapid evolution.** During selective process,  
299 an increase of the linkage disequilibrium is expected, especially in genomic regions strongly under  
300 selection. First, we calculated pairwise linkage disequilibrium (LD) among all set of SNPs using  
301 VCFtools (function --geno-r2) for 256 samples within each population. The associated median LD was  
302 then estimated and plotted. Second, a pairwise LD among SNPs in the surrounding of SNPs highly  
303 under selection in bumblebee treatment were calculated using plink1.9 (function -r2). Finally, we  
304 calculated the LD blocks in each population using plink1.9 with the following parameters: --blocks no-  
305 pheno-req --maf 0.07 --blocks-max-kb 200.

306 **Candidate genes.** We identified candidate genes associated with 43 SNPs with the highest significant  
307 allele frequency changes ( $p$ -value < 0.01 and  $\text{abs}(\Delta h) > 0.5$ ) for the bumblebee treatment. Because the  
308 median linkage disequilibrium in bumblebee treatment is 4.2kb, we retrieved the annotated genes  
309 around 4.2kb (2.1 kb upstream and 2.1 kb downstream) for 43 SNPs and extracted the gene description  
310 using phytozome.jgi.doe.gov. Because some gene descriptions were missing or partially incorrect, we  
311 double checked the description of genes using well documented *Arabidopsis thaliana* (Brassicaceae)  
312 databases. The gene sequences were extracted for the different transcripts from phytozome, blasted

313 on TAIR ([www.arabidopsis.org](http://www.arabidopsis.org)), and the description of gene record as well as the GO biological process  
314 available for *A. thaliana* was extracted.

315 **Nucleotide diversity and genome-wide variance.** We estimated the genetic diversity using a marker-  
316 based index *i.e.* the nucleotide diversity ( $\pi$ ) over 4'713 SNPs using a 4.2kb sliding windows in VCFtools  
317 (--window-pi). The choice of the window size was made according to the median LD in treatment B9  
318 (median LD = 4.2kb).

319 The genomic variance among individuals per population (*i.e.*, generations\* treatment) was  
320 estimated performing a principal component analysis (PCA) on scaled and centered genotype data  
321 (pcadapt package in R environment, function pcadapt, 67). In order to unravel the changes in genomic  
322 variance over nine generations, we performed the PCA on different sub-datasets:

- 323 1. On the total number of SNPs (*i.e.* 4'713 SNPs).
- 324 2. On 76 SNPs with higher significant ( $p$ value<0.05 and  $\Delta h$ >0.5) allele frequency changes *i.e.*  
325 the genomic regions the most under bumblebee selection.
- 326 3. 1'000 times on 76 randomly choose SNPs controlling sub-sampling effect (details and  
327 results in SI).

328

### 329 **Acknowledgements**

330 We thank Jörg Vogt for the first-generation DNA extraction, and the LGC Genomic group Berlin for the  
331 DNA extraction of other samples, the sequencing and bioinformatic treatment. We thank Cyril Zipfel  
332 for discussion regarding candidate genes. We thank Loren Rieseberg and Marius Rösti for their useful  
333 comments on the draft. Finally, we thank the University of Zürich for their financial support.

334

335

336

337

338 **References**

- 339 1. Van der Niet, T., Peakall, R. & Johnson, S.D. Pollinator-driven ecological speciation in plants: new  
340 evidence and future perspectives. *Annals of Botany*. **113**, 199–211 (2014).
- 341 2. Biesmeijer, J. C. *et al.* Parallel declines in pollinators and insect-pollinated plants in Britain and the  
342 Netherlands. *Science*. **313**, 351–354 (2006).
- 343 3. Hallmann, C. *et al.* More than 75 percent decline over 27 years in total flying insect biomass in  
344 protected areas. *PLoS ONE*. **12**(10), e0185809 (2017).
- 345 4. Wagner, D. L., Grames, E. M., Forister, M. L., Berenbaum, M. R. & Stopak, D. Insect decline in the  
346 Anthropocene: Death by a thousand cuts. *PNAS*. **118**(2), e2023989118 (2020).
- 347 5. Anderson, B., Pauw, A., Cole, W. W. & Barrett S. C. H. Pollination, mating and reproductive fitness in  
348 a plant population. *Journal of Evolutionary Biology*. **29**, 1631–1642 (2016).
- 349 6. Minnaar, C., Anderson, V., de Jager, M. L., & Karron, J. D. Plant–pollinator interactions along the  
350 pathway to paternity. *Annals of Botany*. **123**, 225–245 (2019).
- 351 7. Wessinger, C. A. & Hileman, L. C. Accessibility, constraint, and repetition in adaptive floral evolution.  
352 *Developmental Biology*. **419**, 175–183 (2016).
- 353 8. Bradshaw, H. D. & Schemske, D. W. Allele substitution at a flower colour locus produces a pollinator  
354 shift in monkeyflowers. *Nature*. **426**, 176–178 (2003).
- 355 9. Sobral, M., Veiga, T., Domínguez, P., Guitián, J.A., Guitián, P., & Guitián, J. M. Selective pressures  
356 explain differences in flower color among *Gentiana lutea* populations. *PLoS ONE*. **10**(7),  
357 e0132522 (2015).
- 358 10. Gervasi, D. D. L. & Schiestl, F. P. Real-time divergent evolution in plants driven by pollinators. *Nature*  
359 *communications*. **8**, 14691 (2017).
- 360 11. Schiestl, F. P. On the success of a swindle: pollination by deception in orchids. *Naturwissenschaften*.  
361 **92**, 255–264 (2005).
- 362 12. Xu, S., Schlüter, P. M., Grossniklaus, U. & Schiestl, F. P. The genetic basis of pollinator adaptation  
363 in a sexually deceptive Orchid. *PLoS Genet*. **8**(8), e1002889 (2012).
- 364 13. Luo, Y. & Widmer, A. Herkogamy and its effects on mating patterns in *Arabidopsis thaliana*. *PLoS*  
365 *ONE*. **8**(2), e57902 (2013).
- 366 14. Moeller, D. A. & Geber, M. A. Ecological context of the evolution of self-pollination in *Clarkia*  
367 *xantiana*: population size, plant communities, and reproductive assurance. *Evolution*. **59**(4),  
368 786–799 (2005).
- 369 15. Bodbyl Roles, S. A. & Kelly, J. K. Rapid evolution caused by pollinator loss in *Mimulus guttatus*.  
370 *Evolution*. **65**(9), 2541–2552 (2011).
- 371 16. Ramos, S. E. & Schiestl, F. P. Rapid plant evolution driven by the interaction of pollination and  
372 herbivory. *Science*. **364**, 193–196 (2019).
- 373 17. Thomann, M., Imbert, E. & Cheptou, P.O. Is rapid evolution of reproductive traits in *Adonis annua*  
374 consistent with pollinator decline? *Acta Oecologica*. **69**, 161–166 (2015).
- 375 18. Zu, P., Blanckenhorn, W. U. & Schiestl, F. P. Heritability of floral volatiles and pleiotropic responses  
376 to artificial selection in *Brassica rapa*. *New Phytologist*. **209**, 1208–1219 (2016).
- 377 19. Zu, P. & Schiestl, F. P. The effects of becoming taller: direct and pleiotropic effects of artificial  
378 selection on plant height in *Brassica rapa*. *The Plant Journal*. **89**, 1009–1019 (2017).
- 379 20. Bay, R. A. *et al.* Predicting responses to contemporary environmental change using evolutionary  
380 response architectures. *The American naturalist*. **189**(5), 463–473 (2017).
- 381 21. Bergelson, J. & Roux, F. Towards identifying genes underlying ecologically relevant traits in  
382 *Arabidopsis thaliana*. *Nature Reviews Genetics*. **11**, 867–879 (2010).
- 383 22. Hansen, T. F. The evolution of genetic architecture. *Annual Review of Ecology, Evolution, and*  
384 *Systematics*. **37**, 123–57 (2006).
- 385 23. Sicard, A. & Lenhard, M. The selfing syndrome: a model for studying the genetic and evolutionary  
386 basis of morphological adaptation in plants. *Annals of Botany*. **107**, 433–1443 (2011).



- 387 24. Bradshaw, H. D., Wilbert, S. M., Otto, K. G. & Schemsket, D. W. Genetic mapping of floral traits  
388 associated with reproductive isolation in monkeyflowers (*Mimulus*). *Nature*. **376**, 762-765  
389 (1995).
- 390 25. Streisfeld, M. A. & Rausher, M. D. Genetic changes contributing to the parallel evolution of red  
391 floral pigmentation among *Ipomoea* species. *New Phytologist*. **183**, 751–763 (2009).
- 392 26. Yarahmadov, T., Robinson, S., Hanemian, M., Pulver, V. & Kuhlemeier, C. Identification of  
393 transcription factors controlling floral morphology in wild *Petunia* species with contrasting  
394 pollination syndromes. *The Plant Journal*. **104**(2), 289–301 (2020).
- 395 27. Yuan, Y. W., Byers, K. J. R. P. & Bradshaw, H. D. J. The genetic control of flower–pollinator specificity.  
396 *Current Opinion in Plant Biology*. **16**, 422–428 (2013).
- 397 28. Lin, W. *et al.* Nectar secretion requires sucrose phosphate synthases and the sugar transporter  
398 SWEET9. *Nature*. **508**, 546-549 (2015).
- 399 29. Solhaug, E. M. *et al.* An integrated transcriptomics and metabolomics analysis of the *Cucurbita*  
400 pepo nectary implicates key modules of primary metabolism involved in nectar synthesis and  
401 secretion. *Plant Direct*. **3**, e00120 (2019).
- 402 30. Cai, J., Zu, P. & Schiestl F. P. The molecular bases of floral scent evolution under artificial selection:  
403 insights from a transcriptome analysis in *Brassica rapa*. *Scientific Reports*. **6**, 36966 (2016).
- 404 31. Dudareva, N., Negre, F., Nagegowda, D. A. & Orlova, I. Plant Volatiles: Recent Advances and Future  
405 Perspectives. *Critical Reviews in Plant Sciences*. **25**, 417–440 (2006).
- 406 32. Fattorini, R. & Glover, B. J. Molecular Mechanisms of Pollination Biology. *Annual Review of Plant*  
407 *Biology*. **71**, 487-515 (2020).
- 408 33. Klahre, U. *et al.* Pollinator choice in *Petunia* depends on two major genetic loci for floral scent  
409 production. *Current Biology*. **21**, 730-739 (2011).
- 410 34. Lo, S., Fatokun, C., Boukar, O., Gepts, P., Close, T. J., & Muñoz-Amatriain, M. Identification of QTL  
411 for perenniality and floral scent in cowpea (*Vigna unguiculata* [L.] Walp.). *PLoS ONE*. **15**(4),  
412 e0229167 (2020).
- 413 35. Schiestl, F.P. & Johnson, S. D. Pollinator-mediated evolution of floral signals. *Trends in Ecology &*  
414 *Evolution*. **28**, 307-315 (2013).
- 415 36. Hermann, K., Klahre, U., Moser, M., Sheehan, H., Mandel, T. & Kuhlemeier, C. Tight genetic linkage  
416 of prezygotic barrier loci creates a multifunctional speciation island in *Petunia*. *Current Biology*.  
417 **23**, 873–877 (2013).
- 418 37. Smith, S. D. Pleiotropy and the evolution of floral integration. *New Phytologist*. **209**, 80–85 (2015).
- 419 38. Barrett, R. D. H. & Schluter, D. Adaptation from standing genetic. *TRENDS in Ecology and Evolution*.  
420 **23**(1), 38-44 (2008).
- 421 39. Chevin, L. M., Lande, R. & Mace, G. M. Adaptation, plasticity, and extinction in a changing  
422 environment: towards a predictive theory. *PLOS biology*. **8**, e1000357 (2010).
- 423 40. Barton, N. H. & Keightley, P.D. Understanding quantitative genetic variation. *Nature Reviews*  
424 *Genetics*. **3**, 11-21 (2002).
- 425 41. Adebisin, F. *et al.* Emission of volatile organic compounds from *petunia* flowers is facilitated by an  
426 ABC transporter. *Science*. **356**, 1386-1388 (2017).
- 427 42. Terceros G. C., Resentini F., Cucinotta M., Manrique S., Colombo L. & Mendes M. A. The importance  
428 of cytokinins during reproductive development in *Arabidopsis* and beyond. *International Journal*  
429 *of Molecular Sciences*. **21**, 8161 (2020).
- 430 43. Lund, C. H. *et al.* Pectin synthesis and pollen tube growth in *Arabidopsis* involves three GAUT1 Zolgi-  
431 Anchoring Proteins: GAUT5, GAUT6, and GAUT7. *Frontiers in Plant Science*. **11**, 585774 (2020).
- 432 44. Frachon, L. *et al.* Intermediate degrees of synergistic pleiotropy drive adaptive evolution in  
433 ecological time. *Nature Ecology & Evolution*. **1**, 1551–1561 (2017).
- 434 45. Franks, S. J., Kane, N. C., O'hara, N. B., Tittes, S. & Rest, J. S. Rapid genome-wide evolution in  
435 *Brassica rapa* populations following drought revealed by sequencing of ancestral and  
436 descendant gene pools. *Molecular Ecology*. **25**, 3622–3631 (2016).



- 437 46. Frachon, L. *et al.* A genomic map of adaptation to local climate in *Arabidopsis thaliana*. *Frontiers in*  
438 *Plant Science*. **9**, 967 (2018).
- 439 47. Lasky, J. R. *et al.* Genome-environment associations in sorghum landraces predict adaptive traits.  
440 *Science Advances*. **1**, e1400218 (2015).
- 441 48. Li, Y., Cheng, R., Spokas, K. A., Palmer, A. A. & Borevitz, J. O. Genetic variation for life history  
442 sensitivity to seasonal warming in *Arabidopsis thaliana*. *Genetics*. **196**, 569–577 (2014).
- 443 49. Yoder, J. B., Stanton-Geddes, J., Zhou, P., Briskine, R., Young, N. D. & Tiffin, P. Genomic signature  
444 of adaptation to climate in *Medicago truncatula*. *Genetics*. **196**, 1263–1275 (2014).
- 445 50. Csilléry, K., Rodriguez-Verdugo, K., Rellstab, C. & Guillaume, F. Detecting the genomic signal of  
446 polygenic adaptation and the role of epistasis in evolution. *Molecular Ecology*. **27**, 606–612  
447 (2018).
- 448 51. Hendry A. P. Key questions in the genetics and genomics of eco-evolutionary dynamics. *Heredity*.  
449 **111**, 456–466 (2013).
- 450 52. Ferris, K. G, Barnett, L. L., Blackman, B. K. & Willis, J. H. The genetic architecture of local adaptation  
451 and reproductive isolation in sympatry within the *Mimulus guttatus* species complex. *Molecular*  
452 *Ecology*. **26**, 208–224 (2017).
- 453 53. Fishman, L., Kelly, A. J. & Willis, J. H. Minor quantitative trait loci underlie floral traits associated  
454 with mating system divergence in mimulus. *Evolution*. **56**(11), 2138–2155 (2002).
- 455 54. Hall, M. C., Basten, C. J. & Willis, J. H. Pleiotropic quantitative trait loci contribute to population  
456 divergence in traits associated with life-history variation in *Mimulus guttatus*. *Genetics*. **172**,  
457 1829–1844 (2006).
- 458 55. Liu, X. & Karrenberg, S. Genetic architecture of traits associated with reproductive barriers in *Silene*:  
459 Coupling, sex chromosomes and variation. *Molecular Biology*. **27**, 3889–3904 (2018).
- 460 56. Campitelli, B. E., Kenney, A. M., Hopkins, R., Soule, J., Lovell, J. T. & Juenger, T.E. Genetic mapping  
461 reveals an anthocyanin biosynthesis pathway gene potentially influencing evolutionary  
462 divergence between two subspecies of scarlet gilia (*Ipomopsis aggregata*). *Molecular Biology*  
463 *and Evolution*. **35**(4), 807–822 (2017).
- 464 57. Fishman, L., Beardsley, P. M., Stathos, A., Williams, C. F. & Hill, J. P. The genetic architecture of  
465 traits associated with the evolution of self-pollination in *Mimulus*. *New Phytologist*. **205**, 907–  
466 917 (2015).
- 467 58. Borghi, M., Fernie, A. R., Schiestl, F. P. & Bouwmeester, H. J. The sexual advantage of looking,  
468 smelling, and tasting good: the metabolic network that produces signals for pollinators. *Trends*  
469 *in Plant Science*. **22**(4), 338–350 (2017).
- 470 59. Przeworski, M., Coop, G. & Wall, J. D. The signature of positive selection on standing genetic  
471 variation. *Evolution*. **59**(11), 2312–2323 (2005).
- 472 60. Smith, J.M. & Haigh, J. The hitch-hiking effect of a favourable gene. *Genetics research Cambridge*.  
473 **23**, 23–35 (1974).
- 474 61. Barghi, N., Hermisson, J. & Schlötterer, C. Polygenic adaptation: a unifying. *Nature Reviews*  
475 *Genetics*. **21**, 769–781 (2020).
- 476 62. Pritchard, J. K. & Di Rienzo, A. Adaptation – not by sweeps alone. *Nature Reviews Genetics*. **11**(10),  
477 665–667 (2010).
- 478 63. Barton, N. H., Etheridge, A.M. & Véber, A. The infinitesimal model: Definition, derivation, and  
479 implications. *Theoretical Population Biology*. **118**, 50–73 (2017).
- 480 64. Sheng, Z., Pettersson, M. E., Honaker, C. F., Siegel, P. B. & Carlborg, O. Standing genetic variation  
481 as a major contributor to adaptation in the Virginia chicken lines selection experiment. *Genome*  
482 *Biology*. **16**, 219 (2015).
- 483 65. El-Esawi, M. A. Genetic diversity and evolution of Brassica genetic resources: from morphology to  
484 novel genomic technologies – a review. *Plant Genetic Resources: Characterization and*  
485 *Utilization*. **15**(5), 388–399 (2017).

- 486 66. Revell, L. J. learnPopGen: An R package for population genetic simulation and numerical analysis.  
487 *Ecology and Evolution*. **9**, 7896–7902 (2019).  
488 67. Privé, F., Luu, K., Vilhjálmsson, B. J. & Blum, M. G. B. Performing highly efficient genome scans for  
489 local adaptation with R package pcadapt version 4. *Molecular Biology and Evolution*. **37**(7),  
490 2153–2154 (2020).

491  
492

## 493 Legends

494

495 **Figure 1. Allele frequency changes during experimental evolution.** (A) Comparison of the allele  
496 frequency changes ( $\Delta h$ ) between the bumblebee treatment (*x-axis*) and the control treatment (*y-axis*).  
497 The grey dots represent the 4'713 SNPs. (B) Ven diagram for the number of SNPs with highest allele  
498 frequency changes (absolute( $\Delta h$ ) > 0.5) and under significant selection (*pvalue* < 0.05) in the control  
499 treatment (green circle) and the bumblebee treatment (blue circle). Comparison of initial (first  
500 generation) and final (ninth generation) allele frequencies in the control (C) and the bumblebee  
501 treatment (D). The grey dots represent the non-significant changes in allele frequencies between  
502 generations. The grey solid lines indicate the maximum (upper line) or minimum (lower line) of final  
503 simulated allele frequencies obtained by 10'000 simulations of random genetic drift (over nine  
504 generations,  $N_e=16$ ). The green gradient dots represent significant changes (light green for a *pvalue* <  
505 0.05, medium green *pvalue* < 0.01, and dark green *pvalue* < 0.001) calculated from the 10'000  
506 simulations.

507

508 **Figure 2. Genomic scan of allele frequency changes in bumblebee treatment.** The Manhattan plot  
509 shows the absolute genomic changes occurring over nine generations (absolute( $\Delta h$ ), *y-axis*) along the  
510 genome (*x-axis*) for bumblebee treatment (A). The chromosome numbers are indicated below the  
511 plots (from I to X), and the different shades of blue encode changes on different chromosomes. The  
512 coloured dots are the SNPs under selection (green dots for *pvalue* < 0.05, and red dots for *pvalue* <  
513 0.001). We highlighted with the arrows two genomic regions showing important changes near the SNPs  
514 5\_136590 and 7\_18056205. A zoom of 1Mb in the surrounding regions are plotted in (B) for the SNP  
515 in the chromosome V, and in (C) for the chromosome VII. The meaning of the dots is the same than  
516 the Manhattan plot. We added on the plot the median LD ( $r^2$ ) in these genomic regions using the  
517 coloured lines (legend in the bottom left corner of the plot).

518

519 **Figure 3. Linkage disequilibrium and nucleotide diversity.** (A) Distribution of the median pairwise  
520 linkage disequilibrium ( $r^2$ ) for each population by distance between two SNPs (kb). The colour of the  
521 population is indicated in the plot (B) Number of LD blocks per population (more details Table S1). (C)  
522 Density plot of the nucleotide diversity ( $\pi$ ) measuring in sliding windows of 4.2kb for each population  
523 (see legend in 3A for the line colour).

524

525 **Figure 4. Genomic variance among populations.** (A-B) Position of the 256 individuals in the genomic  
526 space from the principal component analysis (PCA) performed on their genotypes (GT). The PCAs were  
527 performed (A) on the total set of SNPs (4'713 SNPs), and (B) on the 76 SNPs the most under selection  
528 in the bumblebee treatment (*pvalue* < 0.05 and absolute( $\Delta h$ ) > 0.5). The label of the population is  
529 shown on their centroid. The relative variance of the PC1 (C) and PC2 (D) are represented with the bar  
530 plots, where the filled bars are for the PCA performed on the 4'713 SNPs, and the dashed ones on the  
531 76 SNPs. The legend colours are indicated in the bottom right of the figure.

532

533

534

535

1 **Figures**

2

3 **Figure 1**

4

**A.**

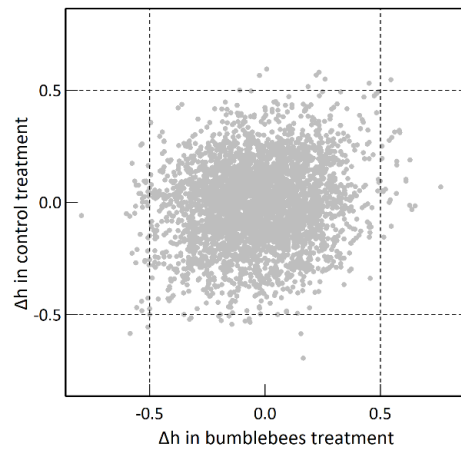

**B.**

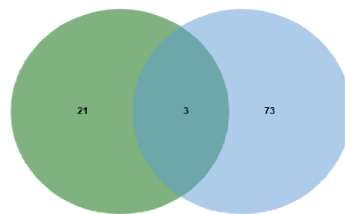

**C.**

**Control treatment**

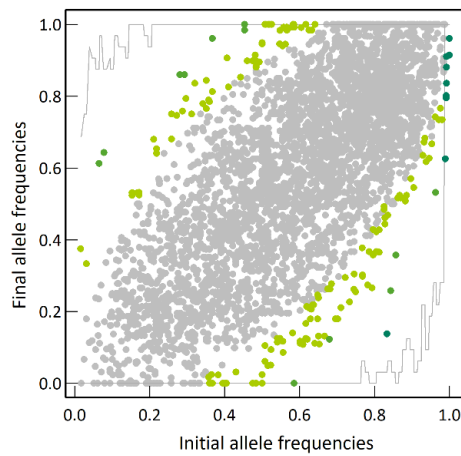

**D.**

**Bumblebee treatment**

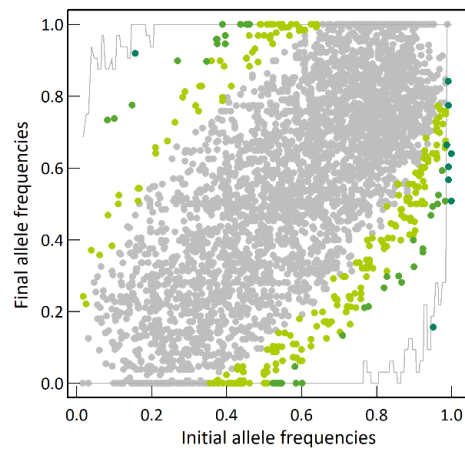

5

6

7 **Figure 2**

8

A. Bumblebee treatment

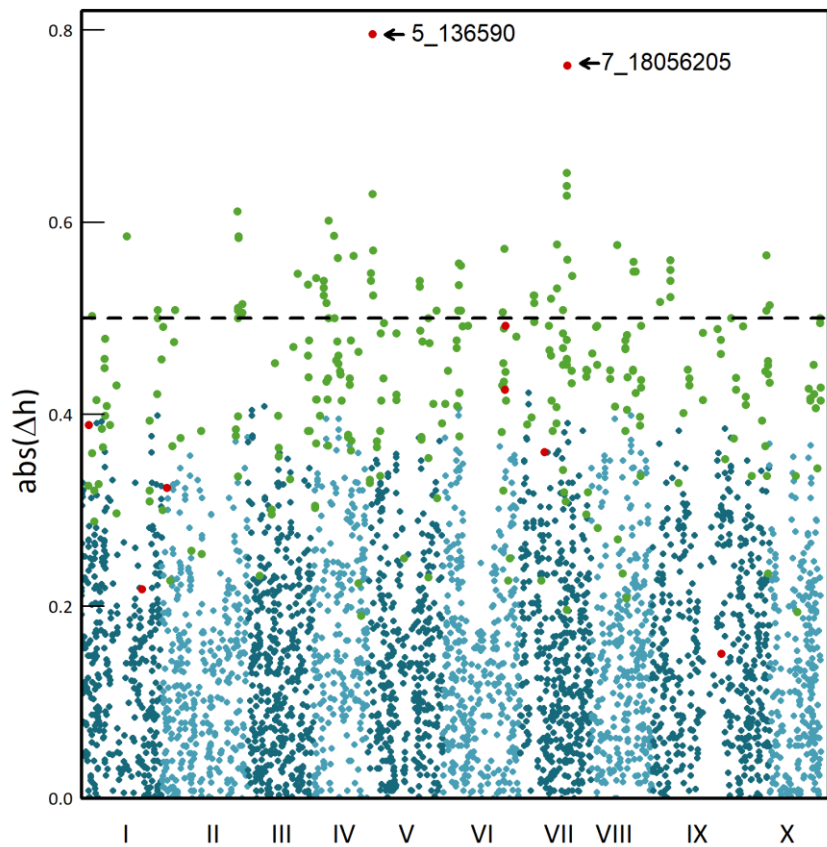

B. Zoom on chrom. V

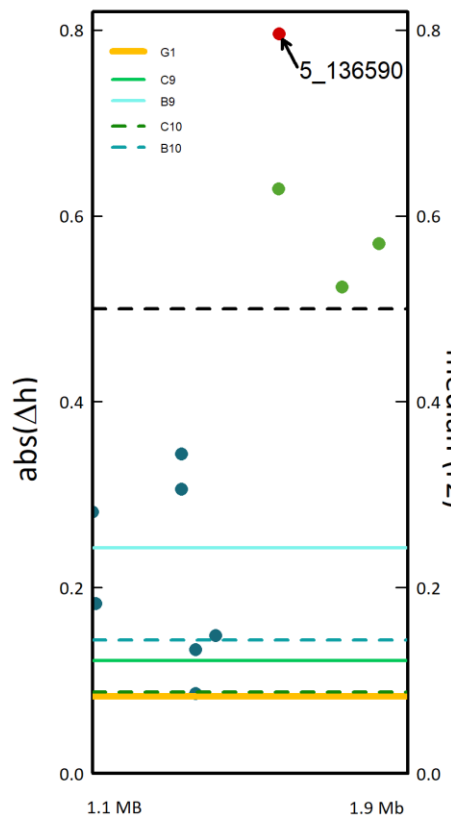

C. Zoom on chrom. VII

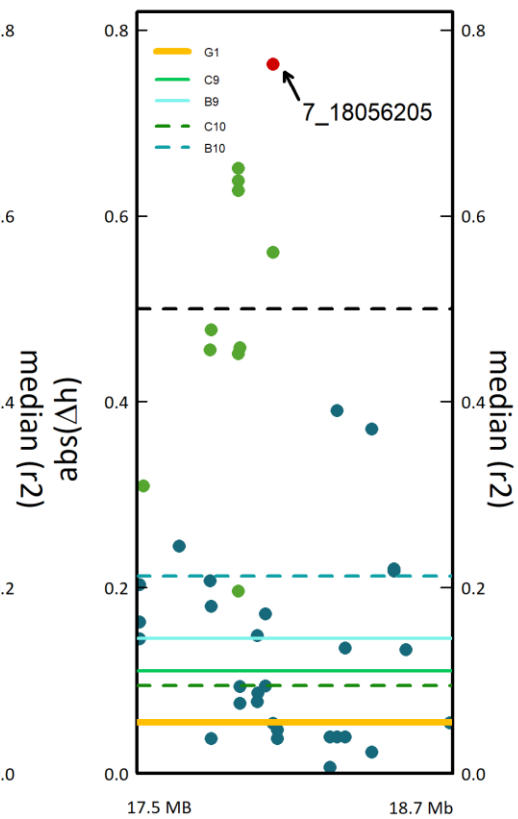

9

10

11

12 **Figure 3**

13

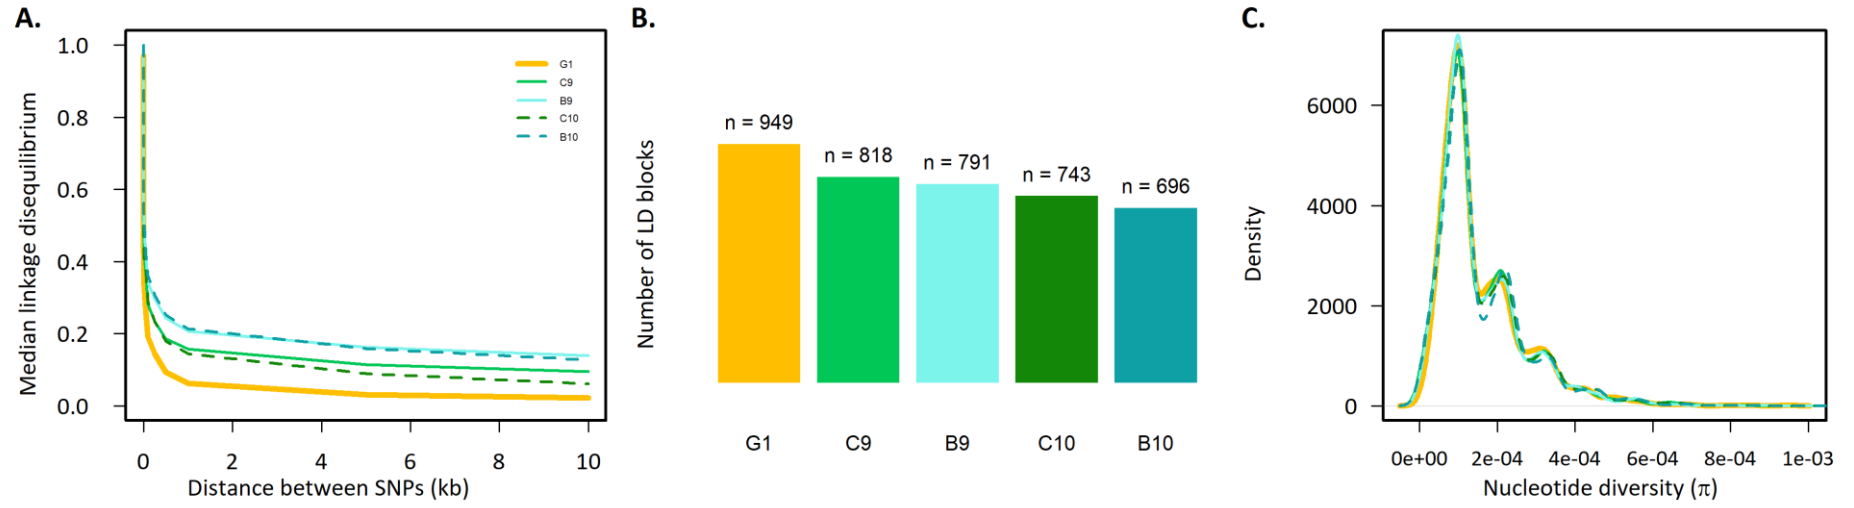

14

15

16

17 **Figure 4**

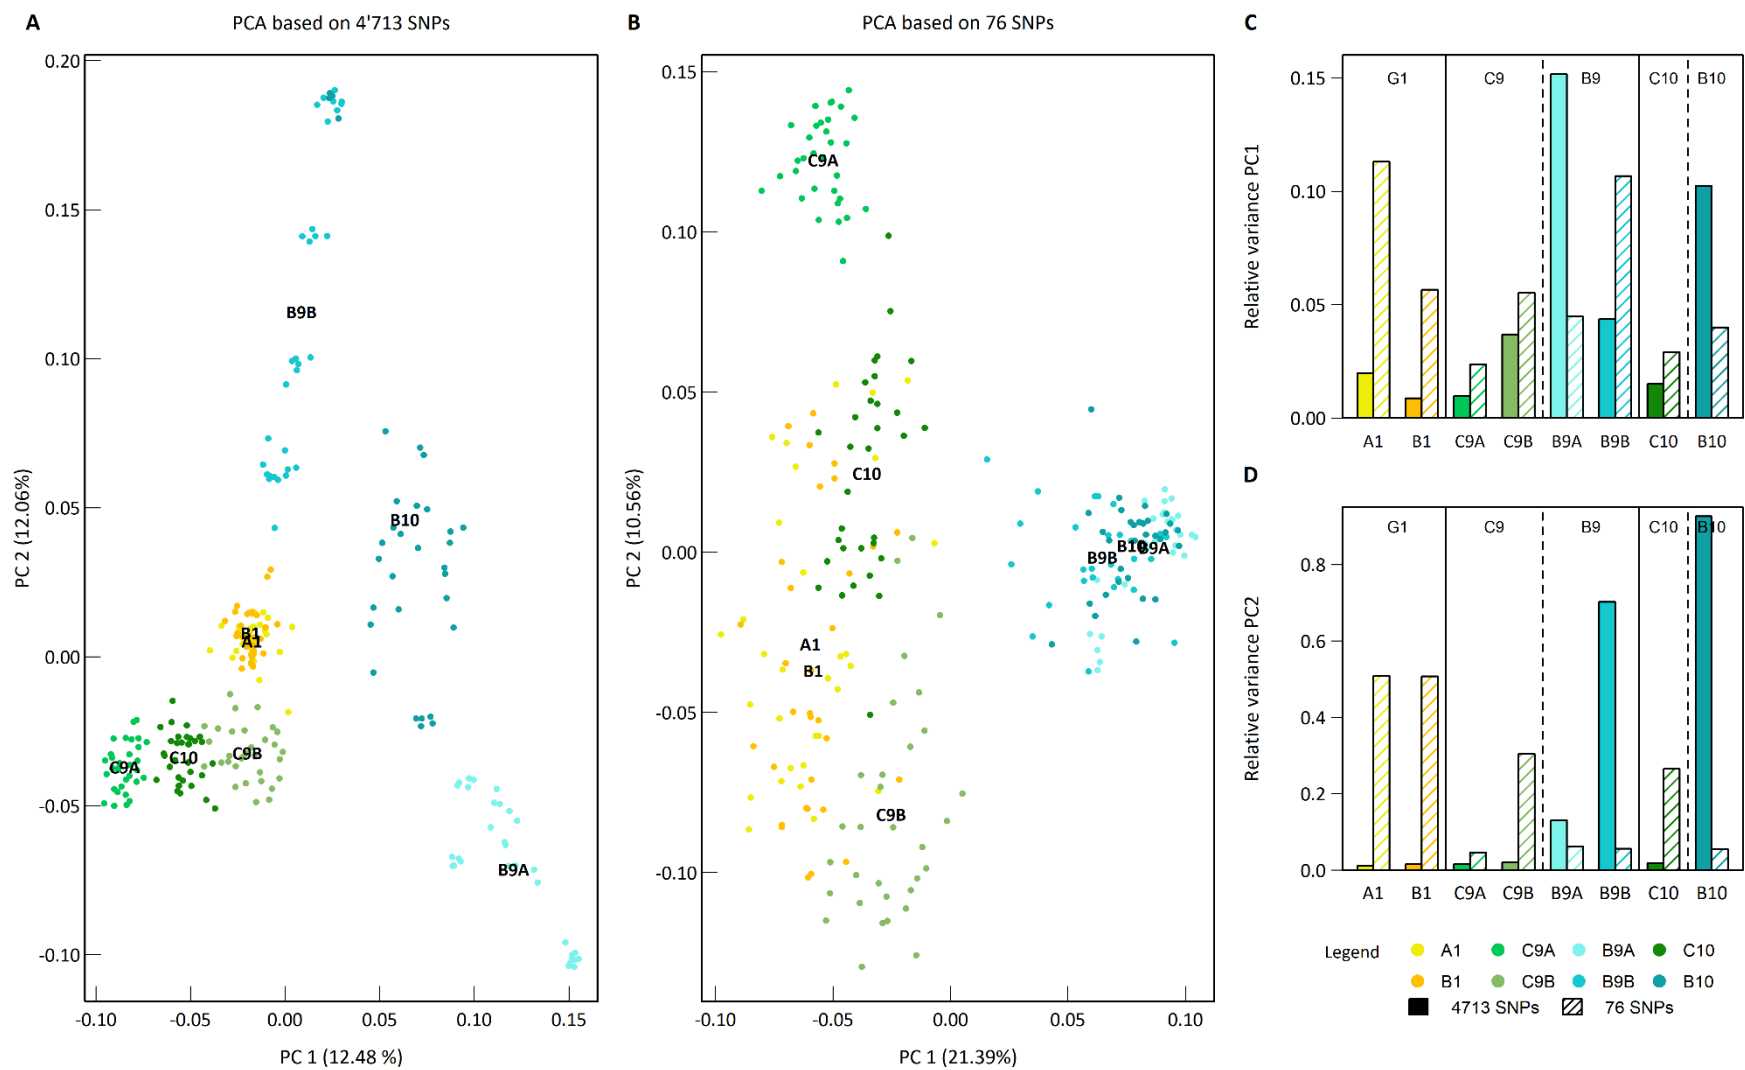

18

19

## Supplementary information

**Title:** Rapid genomic evolution in *Brassica rapa* with bumblebee selection in experimental evolution

### **Author affiliations**

Léa Frachon\*, Florian P. Schiestl

Department of Systematic and Evolutionary Botany, University of Zürich, Switzerland.

\***Corresponding author:** Léa Frachon

Email: [lea.frachon@systbot.uzh.ch](mailto:lea.frachon@systbot.uzh.ch), Phone: +41 44 63 48435

**Key words:** fast cycling *Brassica rapa*, experimental evolution, genomic variance, rapid genomic evolution, bumblebees' selection

### **Abstract**

Insect pollinators shape rapid phenotypic evolution of traits related to floral attractiveness and plant reproductive success. However, the underlying genomic changes and their impact on standing genetic variation remain largely unknown despite their importance in predicting adaptive responses in nature or in crop's artificial selection. Here, based on a previous, nine generation experimental evolution study with fast cycling *Brassica rapa* plants adapting to bumblebees, we document genomic evolution associated to the adaptive process. We performed a genomic scan of the allele frequency changes along the genome and estimated the nucleotide diversity and genomic variance changes. We detected signature of selection associated with rapid changes in allelic frequencies on multiple loci. During experimental evolution, we detected an increase in overall genomic variance, whereas for loci under selection, a reduced variance was apparent in both replicates suggesting a parallel evolution. Our study highlights the polygenic nature of short-term pollinator adaptation and the importance of a such genetic architecture in the maintenance of genomic variance during strong natural selection by biotic factors.

## Control of subsampling effect in genomic PCA

In order to control for a potential artefact due to a subsampling, we performed the PCA analysis 1'000-times with 76 SNPs randomly chosen within the full dataset of 4'713 SNPs. The relative variance measured among those 1'000 PCAs was homogenous for the first generation and in the control treatment (ninth and tenth generations, **Figure S4**). However, the measured relative variance for the bumblebee treatment (ninth and tenth generations) among the 1'000 PCA was highly variable on the fourth PCs compared to the first generation or control treatment (**Figure S4**). Moreover, the genomic variance observed based on the 76 SNPs under bumblebee selection (**Figure 5**) was mostly located (not all significantly) in the lower tail of the PC values distribution obtained randomly, confirming that the observed decrease in genomic variance during bumblebee selection is probably not due to an artifact of sub-sampling (**Figure S4**).

**Figure S1. Design of the experimental evolution experiment.**

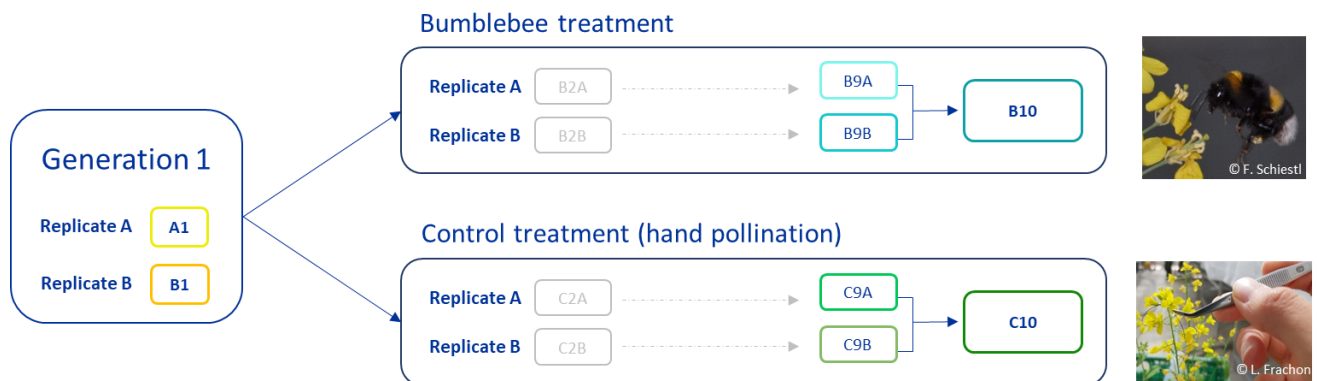



**Figure S2. Upper part: histogram of MAF before (5637 SNPs) and after (4713 SNPs) cutting for  $maf < 0.1$ . Below part: histogram of average read depth (DP) over 256 samples for each 4713 SNPs.**

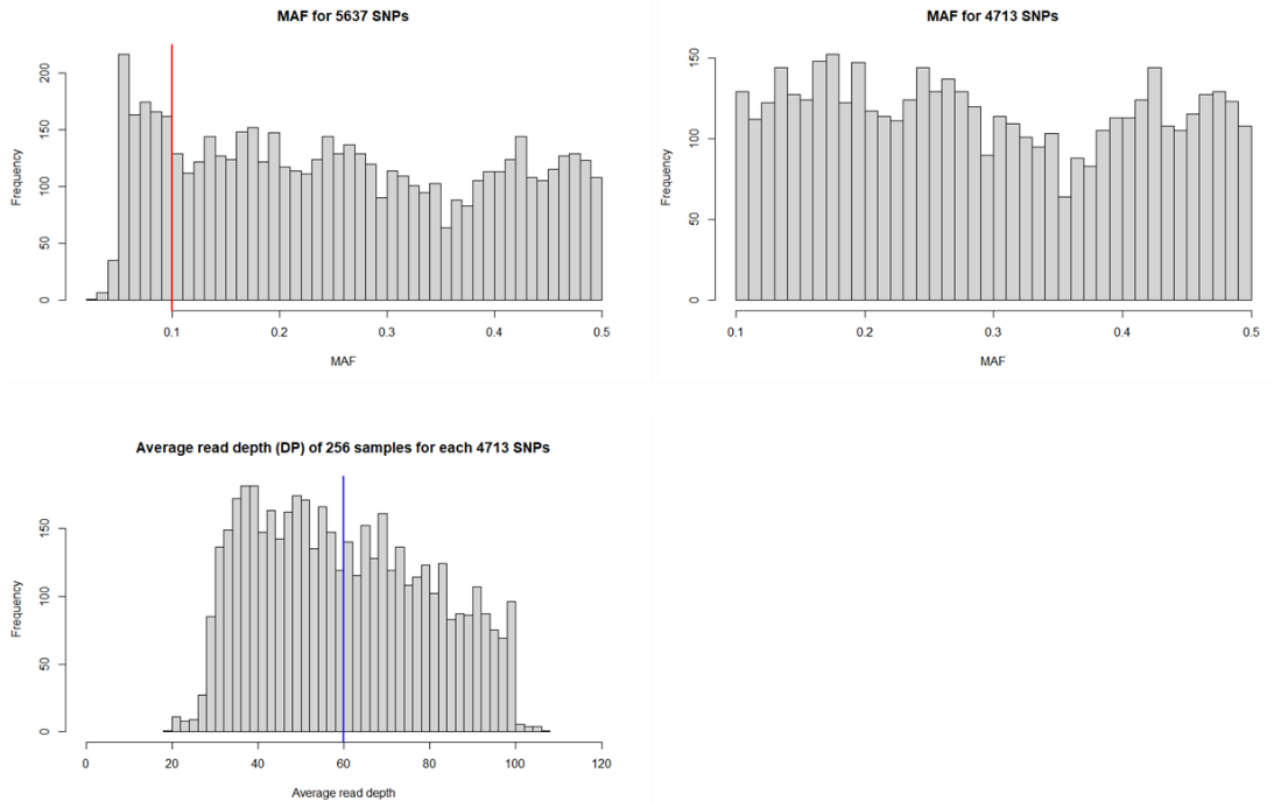

**Figure S3. Plot Nucleotide replicates details**

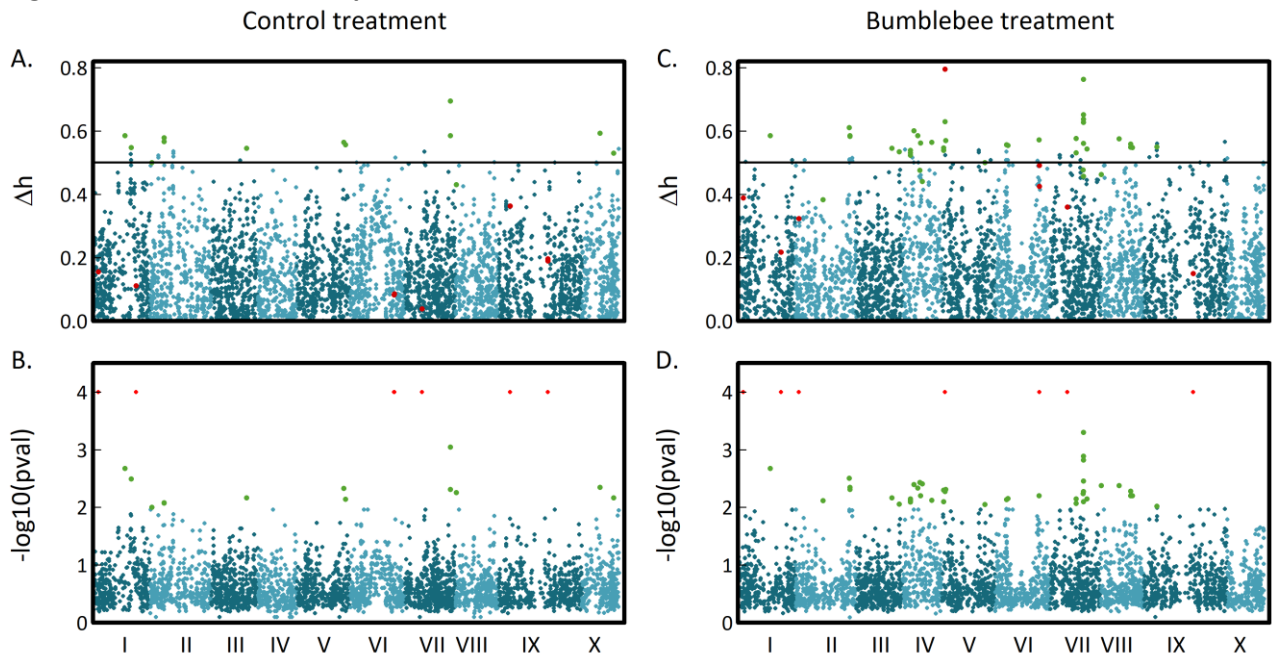

**Figure S4. Plot of the PC3 & PC4 performed on 4'713 SNPs and 145 SNPs**

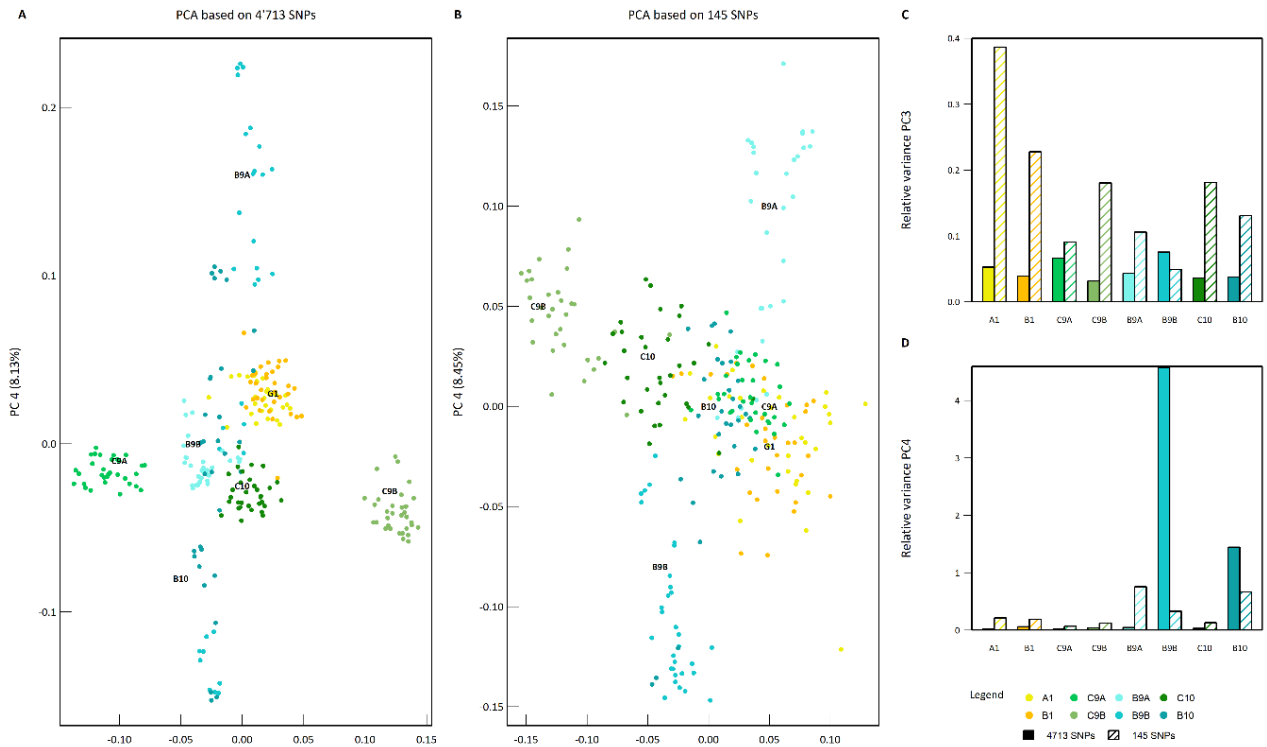

**Figure S5. Jitter plots of the variance of the 256 samples on the genomic space from 1'000 PCA performed on 76 random SNPs.** The red dots are the variance of these 256 samples on the genomic space from PCA performed on 76 SNPs un bumblebee selection. The significances above the jitter plots indicate whether the variance of the PCs from the 76 SNPs is significantly different from the distribution of the PCs from the 1'000 PCAs.

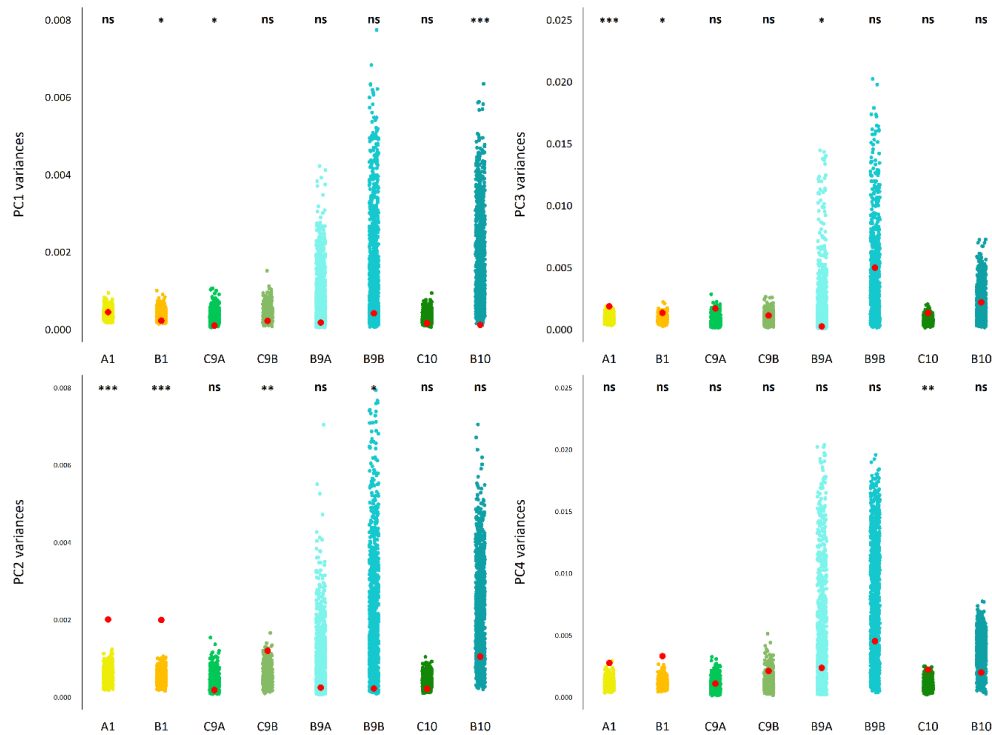

**Table S1. Linkage disequilibrium blocks.** For each population, the number of LD blocks, the mean (+-sd) of the number of SNPs per LD block, and the length (in kb) of LD blocks.

|     | Nb. LD blocks | Mean Nb. SNPs / LD block | Median Nb. SNPs / LD block | Mean LD block length (kb) | Median LD block length (kb) |
|-----|---------------|--------------------------|----------------------------|---------------------------|-----------------------------|
| G1  | 949           | 3.16                     | 3                          | 13.48                     | 0.13                        |
| C9  | 818           | 3.85                     | 3                          | 36.04                     | 0.25                        |
| B9  | 791           | 4.16                     | 4                          | 53.55                     | 4.23                        |
| C10 | 743           | 3.53                     | 3                          | 24.86                     | 0.15                        |
| B10 | 696           | 3.87                     | 3                          | 38.94                     | 0.17                        |

**Table S2. List of 32 candidate genes.**

| Gene ID<br>( <i>B. rapa</i> ) | protein name | Description (Phytozome)                                                 | Gene ID<br>( <i>A. thaliana</i> ) | protein name<br>( <i>A. thaliana</i> ) | GO term biological Process ( <i>A. thaliana</i> )                                                                                                                                                                                                                                                                                                                                                                                                                                                                                                        |
|-------------------------------|--------------|-------------------------------------------------------------------------|-----------------------------------|----------------------------------------|----------------------------------------------------------------------------------------------------------------------------------------------------------------------------------------------------------------------------------------------------------------------------------------------------------------------------------------------------------------------------------------------------------------------------------------------------------------------------------------------------------------------------------------------------------|
| Brara.B03446                  | LRR_3        | Leucine Rich Repeat (LRR_3)                                             | AT5G51630                         | NA                                     | signal transduction                                                                                                                                                                                                                                                                                                                                                                                                                                                                                                                                      |
| Brara.B03515                  | GRF1         | GRF1 (growth regulator factor) -INTERACTING FACTOR 1                    | AT5G28640.3                       | GRF1, AN3                              | cell division, leaf development, regulation of gene expression                                                                                                                                                                                                                                                                                                                                                                                                                                                                                           |
| Brara.B03516                  | NA           | NA                                                                      | AT5G28610                         | LOW protein                            | biological_process                                                                                                                                                                                                                                                                                                                                                                                                                                                                                                                                       |
| Brara.C03679                  | PEX3         | peroxin-3                                                               | AT3G18160                         | PEX3-1                                 | peroxisome organization, protein import into peroxisome membrane                                                                                                                                                                                                                                                                                                                                                                                                                                                                                         |
| Brara.C03680                  | NA           | EamA-like transporter family                                            | AT3G18200.2                       | UMAMIT4                                | NA                                                                                                                                                                                                                                                                                                                                                                                                                                                                                                                                                       |
| Brara.C04359                  | PSMA7        | 20S proteasome subunit alpha 4 (PSMA7)                                  | AT3G51260                         | PAD1                                   | proteasomal ubiquitin-independent protein catabolic process, proteasome-mediated ubiquitin-dependent protein catabolic process, ubiquitin-dependent protein catabolic process                                                                                                                                                                                                                                                                                                                                                                            |
| Brara.C04360                  | RIOK2        | RIO kinase 2 (RIOK2)                                                    | AT3G51270                         | NA                                     | maturation of SSU-rRNA, protein phosphorylation                                                                                                                                                                                                                                                                                                                                                                                                                                                                                                          |
| Brara.D00527                  | NA           | NA                                                                      | AT3G53490                         | NA                                     | biological_process                                                                                                                                                                                                                                                                                                                                                                                                                                                                                                                                       |
| Brara.D00530                  | LOG3         | CYTOKININ RIBOSIDE 5'-MONOPHOSPHATE PHOSPHORIBOHYDROLASE LOG3-RELATED   | AT3G53450                         | LOG4                                   | cytokinin biosynthetic process                                                                                                                                                                                                                                                                                                                                                                                                                                                                                                                           |
| Brara.D00531                  | RPL12        | large subunit ribosomal protein L12e (RP-L12e, RPL12)                   | AT3G53430                         | NA                                     | translation                                                                                                                                                                                                                                                                                                                                                                                                                                                                                                                                              |
| Brara.D00706                  | Zein-binding | Zein-binding                                                            | AT4G13630                         | MYOB13                                 | biological_process                                                                                                                                                                                                                                                                                                                                                                                                                                                                                                                                       |
| Brara.D00707                  | NA           | ETHYLENE-RESPONSIVE TRANSCRIPTION FACTOR CRF5-RELATED                   | AT4G13620.1                       | NA                                     | regulation of transcription, DNA-templated                                                                                                                                                                                                                                                                                                                                                                                                                                                                                                               |
| Brara.D00848                  | PRR_2        | PRR repeat family                                                       | AT5G37570                         | NA                                     | RNA modification                                                                                                                                                                                                                                                                                                                                                                                                                                                                                                                                         |
| Brara.D00997                  | GRX          | Glutaredoxin (GRX) family                                               | AT3G28850                         | NA                                     | NA                                                                                                                                                                                                                                                                                                                                                                                                                                                                                                                                                       |
| Brara.D01757                  | NA           | NAD(P)-BINDING ROSSMANN-FOLD SUPERFAMILY PROTEIN-RELATED                | AT2G29320.3                       | NAD(P)-binding RNA                     | NA                                                                                                                                                                                                                                                                                                                                                                                                                                                                                                                                                       |
| Brara.E00146                  | LEA-HRGP     | LATE EMBRYOGENESIS ABUNDANT HYDROXYPROLINE-RICH GLYCOPROTEIN            | AT2G46300                         | NA                                     | biological_process                                                                                                                                                                                                                                                                                                                                                                                                                                                                                                                                       |
| Brara.E00147                  | DUF1218      | Protein of unknown function (DUF1218)                                   | AT1G05291.1                       | DUF1218                                | biological_process                                                                                                                                                                                                                                                                                                                                                                                                                                                                                                                                       |
| Brara.E00344                  | POP4         | ribonuclease P protein subunit POP4 (POP4, RPP29)                       | AT2G43190                         | POP4                                   | rRNA processing                                                                                                                                                                                                                                                                                                                                                                                                                                                                                                                                          |
| Brara.E00345                  | PTI1         | PTI1-LIKE TYROSINE-PROTEIN KINASE 1-RELATED                             | AT2G43230                         | CARK6                                  | response to abscisic acid                                                                                                                                                                                                                                                                                                                                                                                                                                                                                                                                |
| Brara.F01068                  | ABCG38       | ABC TRANSPORTER G FAMILY MEMBER 38 - Monosaccharide-transporting ATPase | AT1G15520                         | ABCG40                                 | abscisic acid transport, abscisic acid-activated signaling pathway, cellular response to water deprivation, defense response to oomycetes, import across plasma membrane, import into cell, intercellular transport, lead ion transport, negative regulation of post-embryonic development, response to abscisic acid, response to cold, response to ethylene, response to heat, response to jasmonic acid, response to ozone, response to salicylic acid, response to water deprivation, stomatal closure, terpenoid transport, transmembrane transport |
| Brara.F01236                  | PP2C16       | PROTEIN PHOSPHATASE 2C 16-RELATED                                       | AT1G17550                         | ATHAB2                                 | NA                                                                                                                                                                                                                                                                                                                                                                                                                                                                                                                                                       |
| Brara.F01237                  | NA           | large subunit ribosomal protein L14 (RP-L14, MRPL14, rplN)              | AT1G17560                         | HLL                                    | embryo sac development, integument development, negative regulation of cell death, plant ovule development, response to brassinosteroid, translation                                                                                                                                                                                                                                                                                                                                                                                                     |
| Brara.G01361                  | LOG1         | CYTOKININ RIBOSIDE 5'-MONOPHOSPHATE PHOSPHORIBOHYDROLASE LOG1           | AT2G28305                         | LOG1                                   | cytokinin biosynthetic process                                                                                                                                                                                                                                                                                                                                                                                                                                                                                                                           |
| Brara.G01976                  | GATL6        | GALACTURONOSYLTRANSFERASE-LIKE 6-RELATED                                | AT3G62660                         | GATL7                                  | pectin biosynthetic process                                                                                                                                                                                                                                                                                                                                                                                                                                                                                                                              |
| Brara.G01977                  | SEC61A       | protein transport protein SEC61 subunit alpha                           | AT1G29310.2                       | SEC61A                                 | SRP-dependent cotranslational protein targeting to membrane, translocation, posttranslational protein targeting to membrane, translocation                                                                                                                                                                                                                                                                                                                                                                                                               |
| Brara.G02000                  | ABCG35       | ABC TRANSPORTER G FAMILY MEMBER 35-RELATED                              | AT1G59870                         | ABCG36                                 | response to heat                                                                                                                                                                                                                                                                                                                                                                                                                                                                                                                                         |
| Brara.G02343                  | LRR_3        | Leucine Rich Repeat (LRR_3)                                             | AT1G72840                         | NA                                     | signal transduction                                                                                                                                                                                                                                                                                                                                                                                                                                                                                                                                      |
| Brara.H01604                  | PAT8         | PROTEIN S-ACYLTRANSFERASE 8                                             | AT4G24630                         | NA                                     | peptidyl-L-cysteine S-palmitoylation, protein targeting to membrane                                                                                                                                                                                                                                                                                                                                                                                                                                                                                      |
| Brara.H01605                  | NA           | NA                                                                      | AT4G24590.2                       | RING                                   | biological_process                                                                                                                                                                                                                                                                                                                                                                                                                                                                                                                                       |
| Brara.H01737                  | NA           | NA                                                                      | AT4G37820                         | NA                                     | biological_process                                                                                                                                                                                                                                                                                                                                                                                                                                                                                                                                       |
| Brara.H01738                  | COX6A        | cytochrome c oxidase subunit 6a (COX6A)                                 | AT4G37830.1                       | COX                                    | mitochondrial electron transport, cytochrome c to oxygen                                                                                                                                                                                                                                                                                                                                                                                                                                                                                                 |
| Brara.I01179                  | SLAH1        | S-TYPE ANION CHANNEL SLAH1-RELATED                                      | AT1G62280                         | SLAC1                                  | cellular ion homeostasis, chloride transport, positive regulation of anion channel activity, response to salt stress, response to water deprivation                                                                                                                                                                                                                                                                                                                                                                                                      |

**Figure S3. Genomic variance among populations.** Variance of the 256 samples on the genomic space from PCA performed on the 4'713 SNPs (in e-5).

|     | A1   | B1   | G1   | C9A | C9B  | C9     | B9A  | B9B    | B9     | C10  | B10   |
|-----|------|------|------|-----|------|--------|------|--------|--------|------|-------|
| PC1 | 7.7  | 3.4  | 5.5  | 3.8 | 14.5 | 115.9  | 59.4 | 17.1   | 357.2  | 5.9  | 40.1  |
| PC2 | 4.4  | 6.4  | 5.5  | 6.3 | 7.9  | 7.5    | 51.4 | 275.4  | 1050.3 | 7.3  | 363.4 |
| PC3 | 20.6 | 15.4 | 19.1 | 26  | 12.3 | 1406.8 | 17   | 29.5   | 42.2   | 14.2 | 14.6  |
| PC4 | 9.2  | 23.2 | 16.4 | 5.6 | 16.2 | 25.3   | 16.6 | 1795.1 | 995.3  | 10.7 | 565.4 |

**Table S4. Genomic variance among populations.** Variance of the 256 samples on the genomic space from PCA performed on the 76 SNPs (in e-5).

|     | A1    | B1    | G1    | C9A   | C9B   | C9     | B9A   | B9B   | B9    | C10   | B10   |
|-----|-------|-------|-------|-------|-------|--------|-------|-------|-------|-------|-------|
| PC1 | 44.2  | 22.1  | 32.7  | 9.3   | 21.6  | 36.6   | 17.5  | 41.7  | 41.4  | 11.4  | 15.6  |
| PC2 | 200.4 | 199.5 | 198.5 | 18.3  | 119.9 | 1127.6 | 24.4  | 22.2  | 23.2  | 104.5 | 21.6  |
| PC3 | 185.3 | 132.3 | 157   | 168.8 | 112.2 | 240.6  | 22.1  | 498.2 | 299.4 | 217.4 | 132.1 |
| PC4 | 276.7 | 330.2 | 299.2 | 109.7 | 210.2 | 227    | 235.6 | 450.9 | 690.7 | 198.6 | 221.2 |
